# Supplementary material for: Human adipose tissue expansion in pregnancy is impaired in gestational diabetes mellitus
Source: PubMed Central journal article supplement (PMC4526585; doi:10.1007/s00125-015-3662-0), 2015-06-13
Supplement: 125_2015_3662_MOESM1_ESM.pdf [file 125_2015_3662_MOESM1_ESM.pdf]

| KEGG Enrichment                                                                                                     |      |                                                   |            |
|---------------------------------------------------------------------------------------------------------------------|------|---------------------------------------------------|------------|
| Probes with KEGG annotations in above list: 188                                                                     |      |                                                   |            |
| The chip holds 5870 probes annotated to 229 pathways                                                                |      |                                                   |            |
| Gene List                                                                                                           | Path | Path Name                                         | P-val      |
| ↓ DNAJA2 OS9 CKAP4 CRYAB ERN1 SEC61G UBQLN1 STT3A M<br>AP3K5PRKCSH SKP1 SSR1 SSR3 UBE2D1 XBP1 CAPN1 MBTPS1<br>PDIA4 | 4141 | Protein processing<br>in endoplasmic<br>reticulum | 4.77E-08   |
| ↓ MYL9 COL6A1 COL6A2 CTNNB1 FYN PARVB ILK ITGA7 ITGB5<br>JUNPDGFA PPP1CB MAPK3 SHC1 THBS1 TLN1 ZYX                  | 4510 | Focal adhesion                                    | 4.35E-06   |
| ↓ FBXO5 PPP1CB PPP2CA PPP2R1A PPP3R1 MAPK3 SKP1 YWH<br>AECAMK2G SMC3 CDC27                                          | 4114 | Oocyte meiosis                                    | 3.39E-05   |
| ↓ CTNNB1 JUN CYCS MAPK3 TCF7L2 TGFB1 TGFB2                                                                          | 5210 | Colorectal cancer                                 | 0.00019882 |
| ↓ SEC61G SRP68 SRPR SEC11C                                                                                          | 3060 | Protein export                                    | 0.00027554 |
| ↓ GNAS JUN PPP2CA PPP2R1A MAPK3 MAPK13 TGFB1 TGFB2<br>CFLAR                                                         | 5142 | Chagas disease<br>(American<br>trypanosomiasis)   | 0.00038197 |
| ↓ CTBP1 CTNNB1 DAAM1 JUN LRP5 PPP2CA PPP2R1A PPP3R1<br>SKP1TCF7L2 CAMK2G                                            | 4310 | Wnt signaling<br>pathway                          | 0.00055785 |
| ↓ CTNNB1 FYN MAPK3 PTPN1 PVRL2 TCF7L2 IQGAP1                                                                        | 4520 | Adherens junction                                 | 0.0006184  |
| ↓ NEDD4L SKP1 UBA1 UBE2D1 UBE2L3 UBE2N ITCH CUL4A CU<br>L7CDC27                                                     | 4120 | Ubiquitin<br>mediated<br>proteolysis              | 0.00081475 |
| ↓ MYL9 CFL1 GSN ITGA7 ITGB5 PDGFA PPP1CB ENAH MAPK3P<br>IP4K2B IQGAP1 ARHGEF7 ARHGEF1                               | 4810 | Regulation of actin<br>cytoskeleton               | 0.00139422 |
| ↓ PPP2CA PPP2R1A MAPK3 SKP1 TGFB1 TGFB2 THBS1                                                                       | 4350 | TGF-beta signaling<br>pathway                     | 0.00157004 |
| ↓ JUN ARHGDIB MAP3K5 NTRK2 MAPK3 MAPK13 SHC1 YWHA<br>ECAMK2G                                                        | 4722 | Neurotrophin<br>signaling pathway                 | 0.00182166 |

**Supplementary Table 1:** Kyoto Encyclopaedia of Genes and Genomes (KEGG) pathways enriched in genes differentially expressed in OM and SQ adipose tissue from non-pregnant compared to pregnant subjects. Genes that were significantly different with a P value of < 0.0001 were used for the analysis.
